# Supplementary material for: Impact of shallow sills on heat transport and stratification regimes in proglacial fjords
Source: Copernicus journal article supplement (doi:10.5194/tc-2023-32), 2023-03-06
Supplement: Supplementary file 1 [file tc-2023-32-supplement.pdf]

## 1 Supplementary Figures

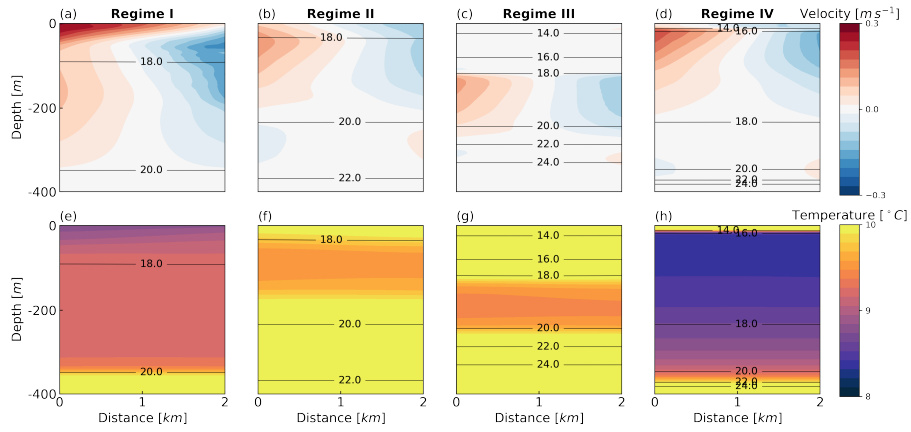

**Figure S1.** Snapshots of along-fjord circulation (top) and temperature (bottom) regimes viewed at cross-section S1. Black contours denote water density anomaly, positive values of velocity represent down-fjord currents.

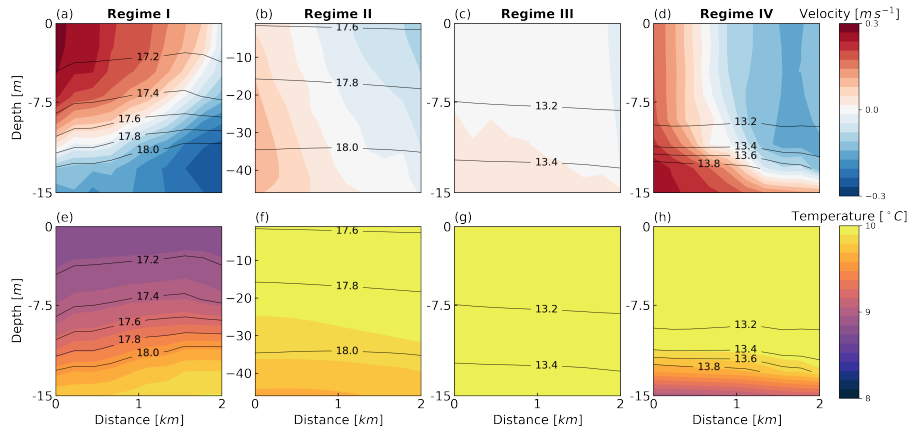

**Figure S2.** Snapshots of along-fjord circulation (top) and temperature (bottom) regimes viewed at the cross-fjord section above the sill. Black contours denote water density anomaly, positive values of velocity represent down-fjord currents.
